# Supplementary material for: WSe2 nanoflowers grown on Ti3C2Cl2 MXene for energy applications and sensing
Source: Springer Nature journal article supplement (doi:10.1038/s41699-025-00577-x), 2025-08-18
Supplement: MOESM1 [file 41699_2025_577_MOESM1_ESM.pdf]

## WSe<sub>2</sub> Nanoflowers Grown on Ti<sub>3</sub>C<sub>2</sub>Cl<sub>2</sub> MXene for Energy Applications and Sensing

*Antonia Kagkoura,\* Anastasios Papavasileiou, Shuangying Wei, Filipa. M. Oliveira, Jiří Šturala, and Zdeněk Sofer\**

*Department of Inorganic Chemistry, Faculty of Chemical Technology, University of Chemistry and Technology Prague, Technická 5, 166 28 Prague 6, Czech Republic*

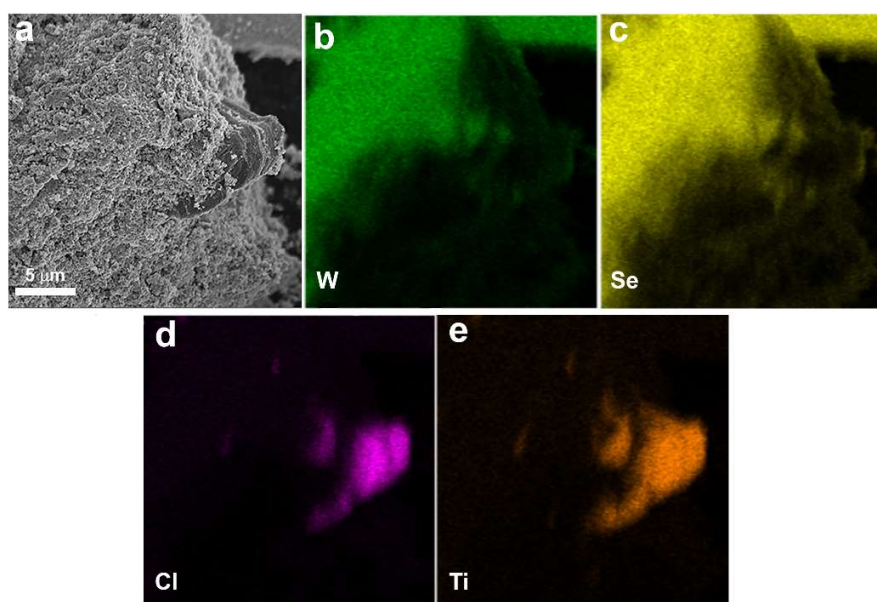

**Figure S1.** EDS elemental maps for (a) w-WSe<sub>2</sub>/Ti<sub>3</sub>C<sub>2</sub>Cl<sub>2</sub> hybrid showing the distribution of (b) W, (c) Se, (d) Cl, and (e) Ti.

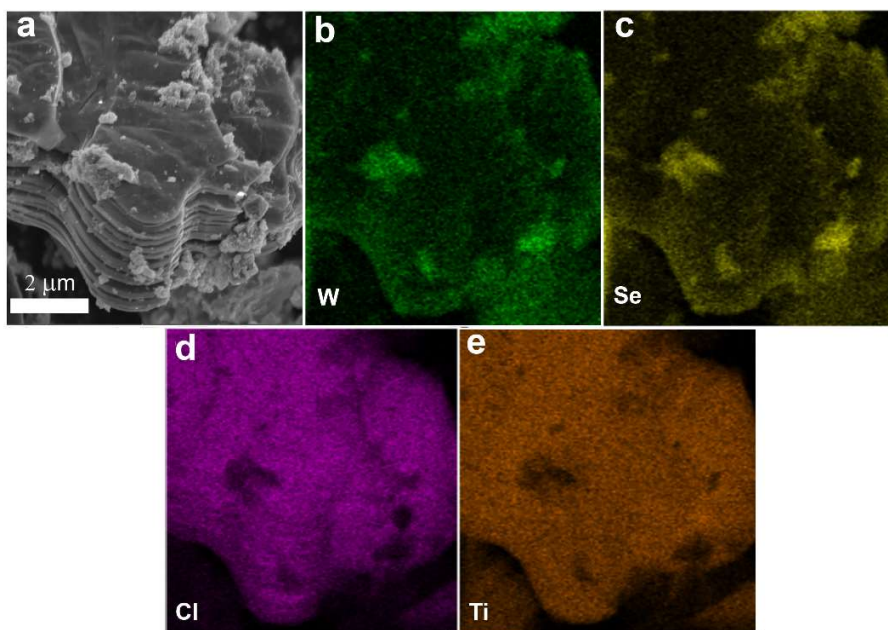

**Figure S2.** EDS elemental maps for (a) m-WSe<sub>2</sub>/Ti<sub>3</sub>C<sub>2</sub>Cl<sub>2</sub> hybrid showing the distribution of (b) W, (c) Se, (d) Cl, and (e) Ti.

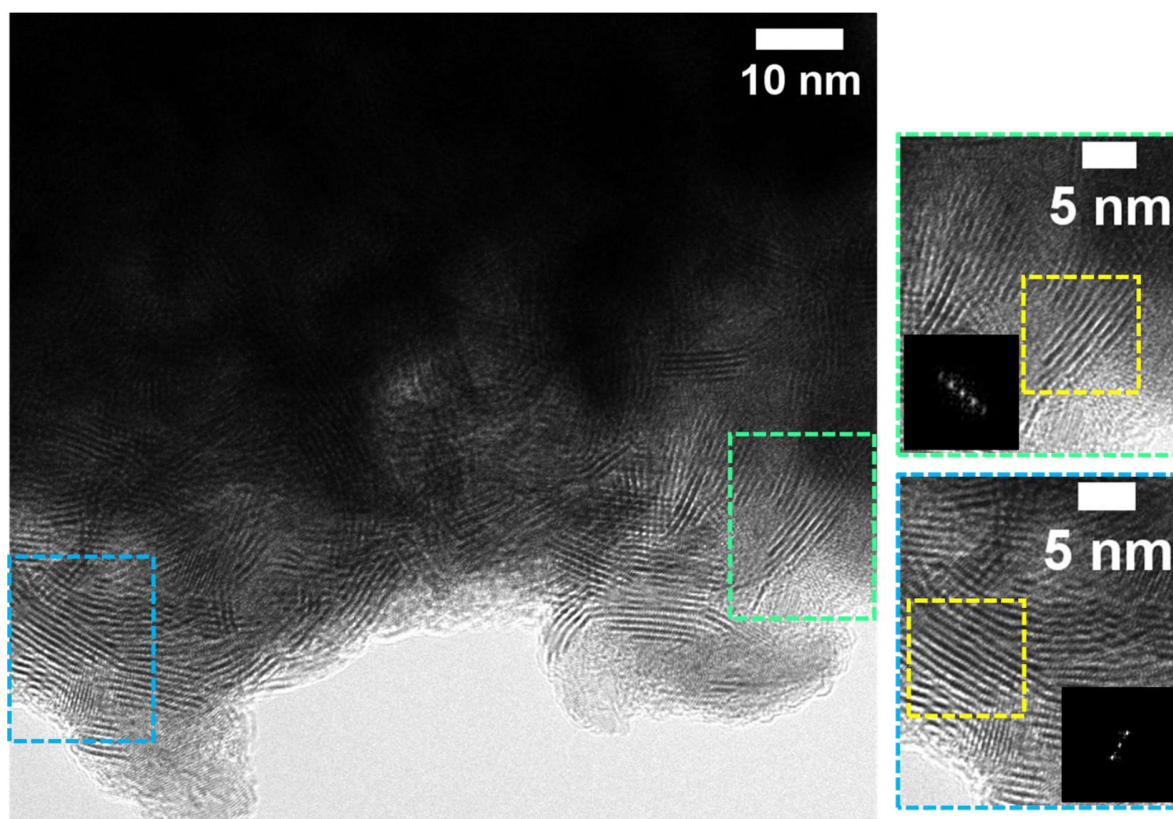

**Figure S3.** Representative HR-TEM image of w-WSe<sub>2</sub>/Ti<sub>3</sub>C<sub>2</sub>Cl<sub>2</sub>, with zoomed-in images of the marked areas and respective FFT patterns.

**Table S1.** Quantification of elements (atomic %) by SEM/EDS.

| <b>Material</b>                                                    | <b>W</b> | <b>Se</b> | <b>Ti</b> | <b>Al</b> | <b>Cl</b> |
|--------------------------------------------------------------------|----------|-----------|-----------|-----------|-----------|
| WSe <sub>2</sub>                                                   | 30.2     | 69.8      | -         | -         | -         |
| Ti <sub>3</sub> C <sub>2</sub> Cl <sub>2</sub>                     | -        | -         | 65.2      | 6.9       | 27.9      |
| w-WSe <sub>2</sub> /Ti <sub>3</sub> C <sub>2</sub> Cl <sub>2</sub> | 16.2     | 41.7      | 12.1      | 1.7       | 6.2       |
| m-WSe <sub>2</sub> /Ti <sub>3</sub> C <sub>2</sub> Cl <sub>2</sub> | 1.9      | 5.7       | 55.1      | 3.3       | 34.0      |

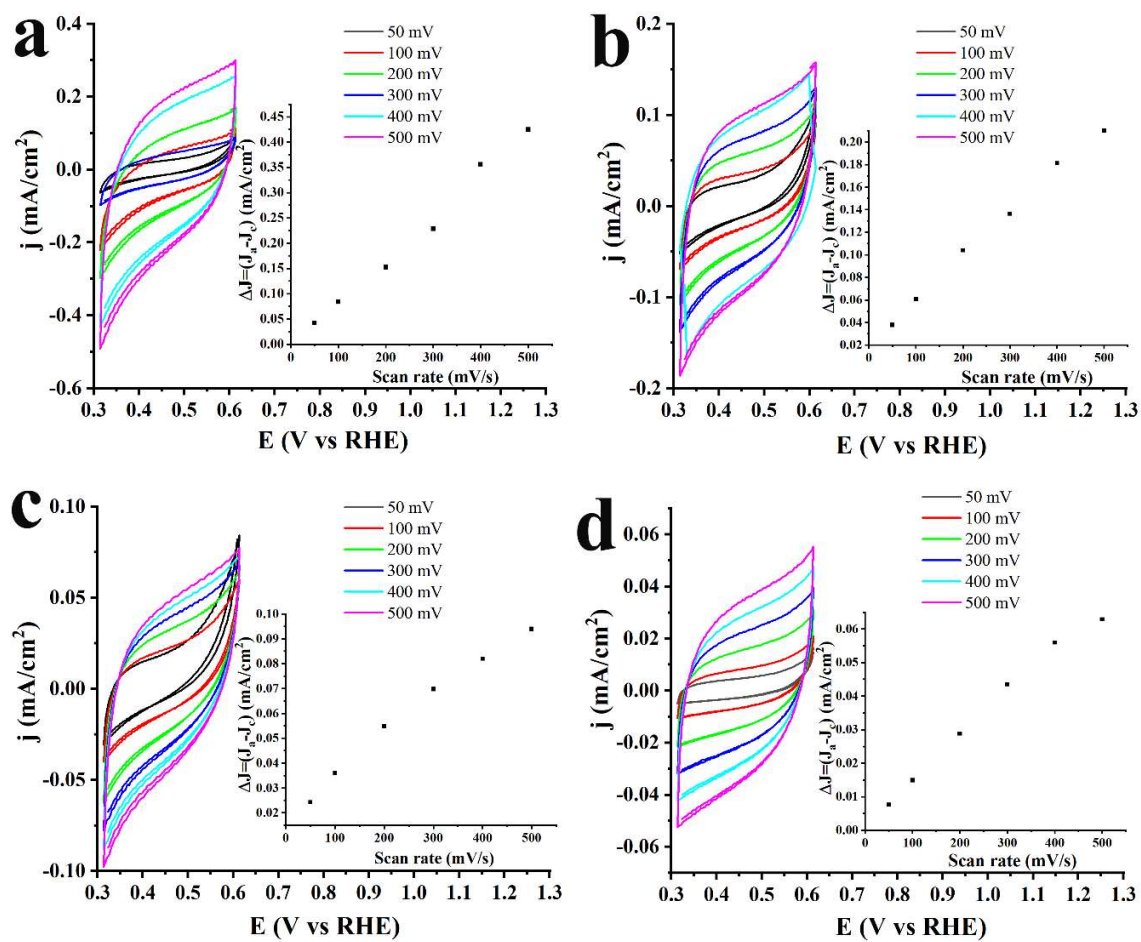

**Figure S4.** Cyclic voltammograms of (a)  $w\text{-WSe}_2/\text{Ti}_3\text{C}_2\text{Cl}_2$ , (b)  $m\text{-WSe}_2/\text{Ti}_3\text{C}_2\text{Cl}_2$ , (c)  $\text{WSe}_2$  and (d)  $\text{Ti}_3\text{C}_2\text{Cl}_2$  MXene in a nitrogen saturated aqueous 0.5 M  $\text{H}_2\text{SO}_4$  electrolyte, at a rotation speed of 1600 rpm and scan rates from 50 to 500 mV/s. Inset: Scan rate dependence of the current densities for the corresponding materials.

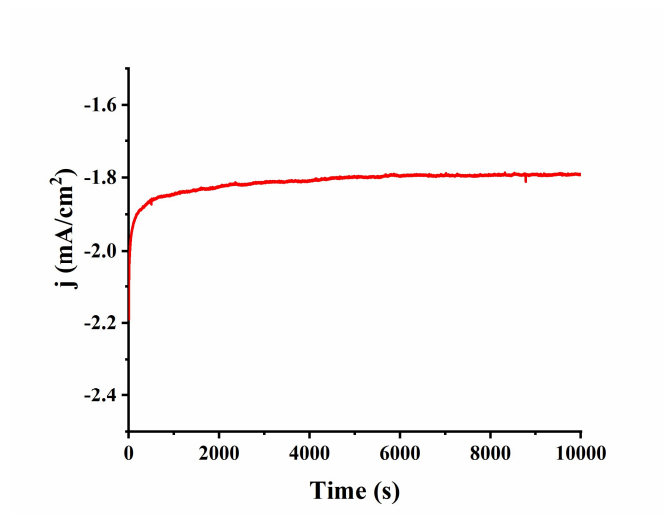

**Figure S5.** Chronoamperometric response at -0.16 V (versus RHE) for 10,000 s for w-WSe<sub>2</sub>/Ti<sub>3</sub>C<sub>2</sub>Cl<sub>2</sub>.

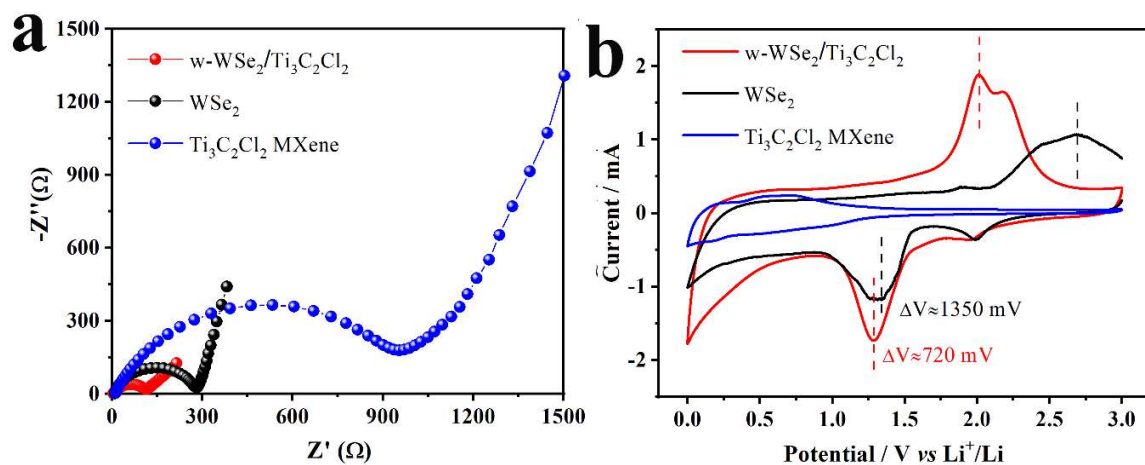

**Figure S6.** (a) Nyquist plots on PC voltage of Ti<sub>3</sub>C<sub>2</sub>Cl<sub>2</sub> MXene, WSe<sub>2</sub>, and w-WSe<sub>2</sub>/Ti<sub>3</sub>C<sub>2</sub>Cl<sub>2</sub> electrodes and the corresponding (b) CV curves at 1.0 mV s<sup>-1</sup>.

**Table S2.** Electrocatalytic HER parameters for all tested materials in 0.5 M H<sub>2</sub>SO<sub>4</sub>.

| Material                                                             | Onset overpotential (mAcm <sup>-2</sup> ) | Overpotential at -10 (mA/cm <sup>2</sup> ) | Tafel slope (mV/dec) | R <sub>ct</sub> (Ω) | ECSA (cm <sup>2</sup> ) | Cdl (μF) |
|----------------------------------------------------------------------|-------------------------------------------|--------------------------------------------|----------------------|---------------------|-------------------------|----------|
| w-WSe <sub>2</sub> /Ti <sub>3</sub> C <sub>2</sub> Cl <sub>2</sub>   | -0.14                                     | -0.19                                      | 50                   | 18.6                | 21.7                    | 868      |
| w-WSe <sub>2</sub> /Ti <sub>3</sub> C <sub>2</sub> Cl <sub>2</sub> * | -0.15                                     | -0.21                                      | 61                   | -                   | -                       | -        |
| m-WSe <sub>2</sub> /Ti <sub>3</sub> C <sub>2</sub> Cl <sub>2</sub>   | -0.19                                     | -0.35                                      | 144                  | 141.1               | 9.0                     | 360      |
| m-WSe <sub>2</sub> /Ti <sub>3</sub> C <sub>2</sub> Cl <sub>2</sub> * | -0.25                                     | -0.36                                      | 136                  | -                   | -                       | -        |
| WSe <sub>2</sub>                                                     | -0.25                                     | -0.46                                      | 186                  | 74.6                | 3.8                     | 152      |
| WSe <sub>2</sub> *                                                   | -0.36                                     | -0.50                                      | 177                  | -                   | -                       | -        |
| Ti <sub>3</sub> C <sub>2</sub> Cl <sub>2</sub> MXene                 | -0.21                                     | -0.40                                      | 112                  | 177.5               | 3.1                     | 124      |
| Ti <sub>3</sub> C <sub>2</sub> Cl <sub>2</sub> MXene*                | -0.27                                     | -0.45                                      | 114                  | -                   | -                       | -        |
| Pt/C (20 wt.%)                                                       | 0.01                                      | -0.031                                     | 42                   | 30                  | -                       | -        |

\*after 10000 cycles

**Table S3.** Comparison of w-WSe<sub>2</sub>/Ti<sub>3</sub>C<sub>2</sub>Cl<sub>2</sub> with reported 2D-Based electrochemical sensors for H<sub>2</sub>O<sub>2</sub> detection in Terms of LOD and LOQ.

| Modifier/<br>Electrode                                               | Technique                                                | Polarization<br>Potential (V) | Linear Range<br>( $\mu$ M) | LOD ( $\mu$ M) | Ref.      |
|----------------------------------------------------------------------|----------------------------------------------------------|-------------------------------|----------------------------|----------------|-----------|
| graphene–<br>AuNPs/GC                                                | Amperometry<br>(N <sub>2</sub> saturate<br>solution)     | -0.4 V                        | 20-280                     | 6.00           | 1         |
| MoS <sub>2</sub> /C <sub>N</sub> -<br>NWs/GC                         | Amperometry                                              | -0.1                          | 2-500                      | 0.73           | 2         |
| m-<br>MoS <sub>2</sub> @CNS/GC                                       | Amperometry<br>(N <sub>2</sub> -saturated 0.1 M<br>NaOH) | -0.35                         | 100-1000<br>2000-20000     | 7.50           | 3         |
| MoS <sub>2</sub> /GC                                                 | CV                                                       | -                             | 10-100                     | 1.13           | 4         |
| WS <sub>2</sub> /GC                                                  | CV                                                       | -                             | 10-90                      | 0.88           | 5         |
| CuO-<br>CeO <sub>2</sub> /MXene/GC                                   | Amperometry                                              | -0.3                          | 5-100                      | 1.67           | 6         |
| Pd-Ti <sub>2</sub> NT <sub>x</sub><br>MXene/GC                       | Amperometry                                              | -0.4                          | 1-300                      | 0.72           | 7         |
| TiO <sub>2-x</sub> /Ti <sub>3</sub> C <sub>2</sub> /FTO              | Amperometry                                              | 0.45                          | 10-5310                    | 1.38           | 8         |
| WSe <sub>2</sub> /Ti <sub>2</sub> C <sub>2</sub> Cl <sub>2</sub> /GC | Amperometry                                              | -0.3                          | 1-88                       | 0.60           | This work |

## References

1. Hu, J. *et al.* One-step synthesis of graphene-AuNPs by HMTA and the electrocatalytical application for O<sub>2</sub> and H<sub>2</sub>O<sub>2</sub>. *Talanta* **93**, 345–349 (2012).
2. Dai, H. *et al.* Molybdenum sulfide/nitrogen-doped carbon nanowire-based electrochemical sensor for hydrogen peroxide in living cells. *Sens Actuators B Chem* **276**, 65–71 (2018).
3. Cho, I. W., Son, S. U., Yang, M. H. & Choi, J. Preparation of microporous MoS<sub>2</sub>@carbon nanospheres for the electrochemical detection of hydrogen peroxide. *Journal of Electroanalytical Chemistry* **876**, (2020).
4. Haritha, V. S., Vijayan, A., Sarath Kumar, S. R. & Rakhi, R. B. Voltammetric determination of hydrogen peroxide using MoS<sub>2</sub> modified glassy carbon electrodes. *Mater Lett* **301**, (2021).
5. Haritha, V. S., Sarath Kumar, S. R. & Rakhi, R. B. Non-enzymatic electrocatalytic detection of hydrogen peroxide using Tungsten disulphide nanosheets modified electrodes. *Materials Science and Engineering: B* **285**, (2022).

6. Zhou, K. *et al.* A novel electrochemical sensor based on CuO-CeO<sub>2</sub>/MXene nanocomposite for quantitative and continuous detection of H<sub>2</sub>O<sub>2</sub>. *Journal of Electroanalytical Chemistry* **921**, (2022).
7. Zhang, Y., He, L., Sun, X., Yang, C. & Li, J. A Sensitive H<sub>2</sub>O<sub>2</sub> Electrochemical Sensor Based on Pd Nanoparticles Decorated Ti<sub>2</sub>NT<sub>x</sub> MXene. *ChemistrySelect* **9**, (2024).
8. Li, Q. *et al.* Cu/Cu<sub>2</sub>O nanoparticles modified Ti<sub>3</sub>C<sub>2</sub> MXene with in-situ formed TiO<sub>2</sub>-X for detection of hydrogen peroxide. *Ceram Int* **49**, 9632–9641 (2023).
